# Supplementary material
Source: publisher figshare collection journal article supplement (https://gsapubs.figshare.com/ndownloader/files/22760240)
Supplement: Supplementary file 1 [file 22760240]

**DATA REPOSITORY: Cosmogenic nuclide sample preparation****Sample preparation**

Quartz was separated from samples and  $^{10}\text{Be}$  isolated from the quartz at the Purdue Rare Isotope Measurement (PRIME) Lab using standard methods (Kohl and Nishiizumi, 1992; Clifton and Granger, 2005; Clifton et al., 2005). Sediment was sieved to a grain size of 0.25 – 0.5 mm in order to remove any windblown detritus. Following dissolution of any carbonates with concentrated  $\text{HNO}_3$ , samples were soaked overnight in a 50%  $\text{HNO}_3/\text{HCl}$  solution in order to remove any metals. Samples were then magnetically separated, typically leaving only quartz and feldspar, with minor amounts of accessory minerals (e.g. zircon, rutile). Samples were then split into ~75 gram fractions and subjected to at least three 10 hour leaches in a warm, continuously agitated 5%  $\text{HF}/\text{HNO}_3$  solution. This treatment dissolves most of the feldspar grains, as well as etches the outside of the quartz grains in order to remove any potential contamination by meteoric  $^{10}\text{Be}$  (Clifton and Granger, 2005). After rinsing and drying, heavy minerals were removed gravimetrically using lithium heteropolytungstate. Samples were then treated with a 1%  $\text{HF}/\text{HNO}_3$  solution overnight in an ultrasonic bath. The resulting clean quartz was spiked with ~300  $\mu\text{g}$  of  $^9\text{Be}$  in a weak  $\text{HNO}_3$  carrier solution and dissolved in a 5:1 solution of concentrated  $\text{HF}$  and  $\text{HNO}_3$ . After the quartz was completely dissolved, the resulting sample solution was evapoconcentrated, transferred to a platinum crucible, and dried. Fluorides were removed by fuming with concentrated  $\text{H}_2\text{SO}_4$ . The resulting sulfate cake was dissolved in concentrated  $\text{HCl}$ , transferred to a Teflon beaker, and dried. This chloride-form sample cake was dissolved in oxalic acid and Be isolated by standard ion chromatography methods according to von Blanckenburg et al. (1996) and Clifton et

al. (2005). Beryllium hydroxide was then precipitated at pH ~9 using  $\text{NH}_4\text{OH}$  in the presence of EDTA, centrifuged and rinsed three times, loaded into quartz crucibles, dried, and then oxidized to BeO at  $1100^\circ\text{C}$  for one hour. The BeO was then crushed, mixed with niobium powder, and loaded into stainless steel holders for analysis by accelerator mass spectrometry (AMS). AMS measurements of  $^{10}\text{Be}/^9\text{Be}$  were made at PRIME Lab against standards prepared by K. Nishiizumi.

## REFERENCES:

- Clifton, T. and Granger, D.E., 2005, Erosion rate of the Appalachian Plateau in the vicinity of the New River Gorge, West Virginia: Abstracts with Programs, Geological Society of America, v. 37, n. 1, p. 18-19.
- Clifton, T., Granger, D.E., Gilbert, Z., Caffee, M.W., 2005, Quartz sample preparation for AMS: The 10<sup>th</sup> International Conference on Accelerator Mass Spectrometry, Abstracts with Program.
- Kohl, C.P. and Nishiizumi, K., 1992, Chemical isolation of quartz for measurement of in situ-produced cosmogenic nuclides: *Geochimica et Cosmochimica Acta*, v. 56, p. 3583-3587.
- von Blanckenburg, F., Belshaw, N. S., O'Nions, R. K., 1996, Separation of  $^9\text{Be}$  and cosmogenic  $^{10}\text{Be}$  from environmental materials and SIMS isotope dilution analysis: *Chemical Geology*, v. 129, p. 93-99.
- von Blanckenburg, F., Hewawasam, T., Kubik, P. W., 2004, Cosmogenic nuclide evidence for low weathering and denudation in the wet, tropical highlands of Sri Lanka: *Journal of Geophysical Research*, v. 109, doi:10.1029/2003JF000049.

Figure DR1. Channel profiles and slope-area data for streams in the Romagna Apennines. See Figure 2 for description of symbols.

Figure DR2. Channel profiles and slope-area data for streams in the Peloritani Mountains. See Figure 2 for description of symbols.

Figure DR3. Channel profiles and slope-area data for streams in the Aspromonte Massif. See Figure 2 for description of symbols.

Figure DR4. Comparison of  $k_{sn}$  values calculated using a range of  $\theta_{ref}$  (from 0.2 to 0.7) to rock uplift rates in the Romagna Apennines (filled diamonds) and Peloritani/Aspromonte (open diamonds). Regressions assume a linear relationship between  $k_{sn}$  and rock uplift rate.

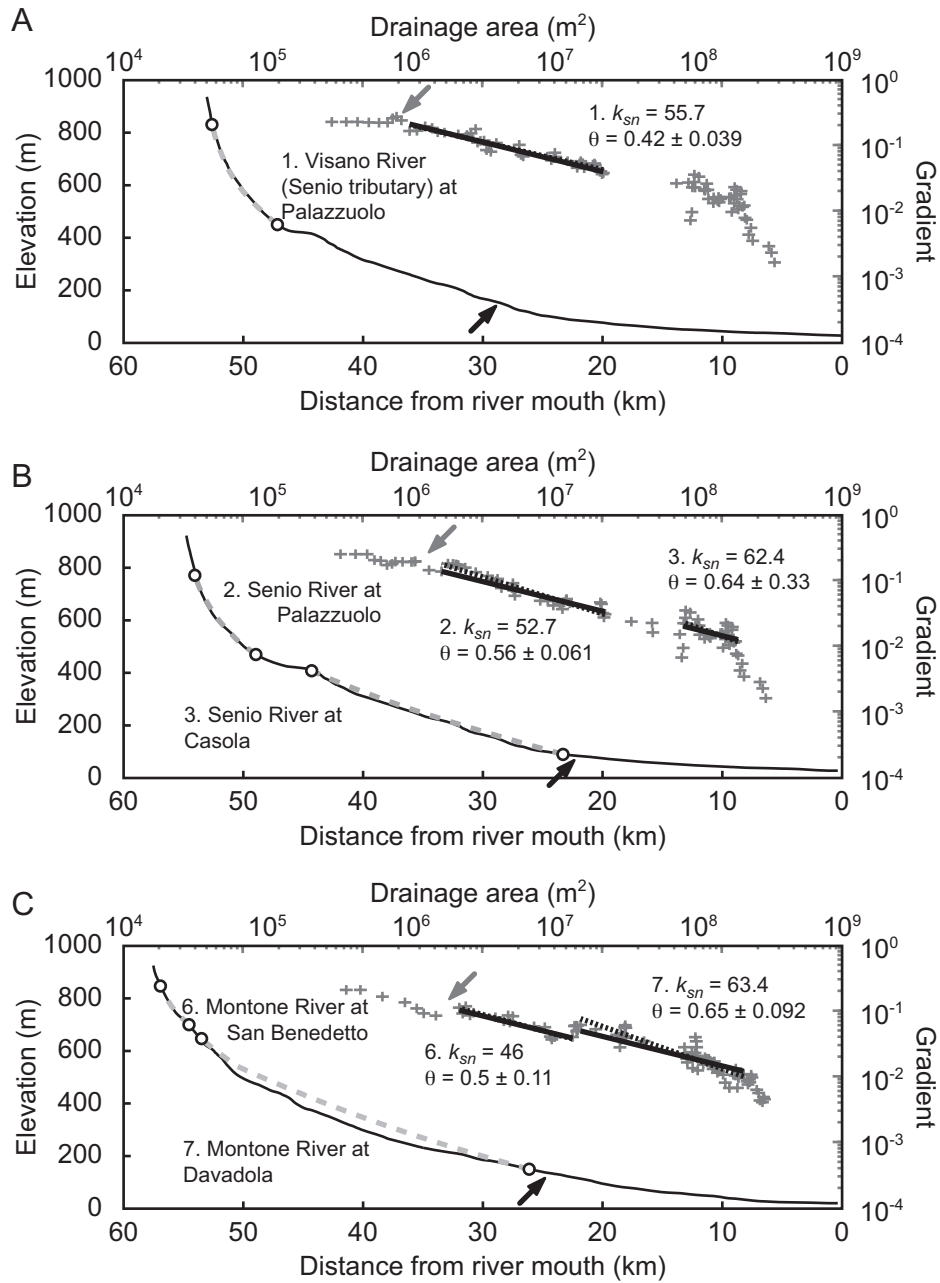

A

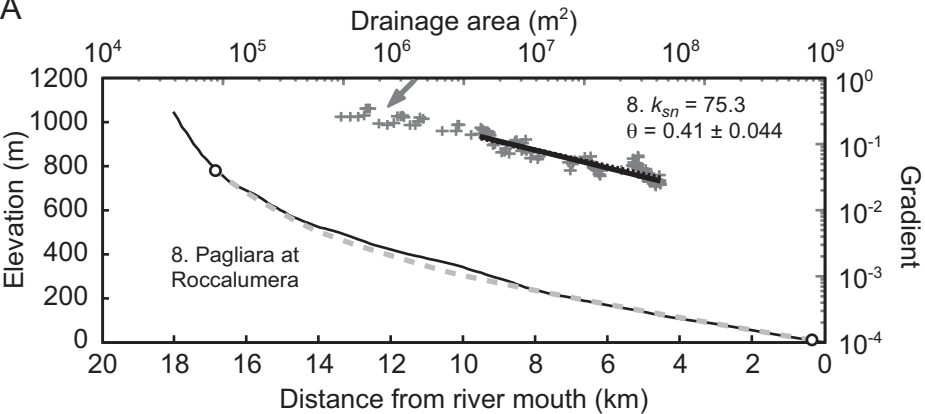

B

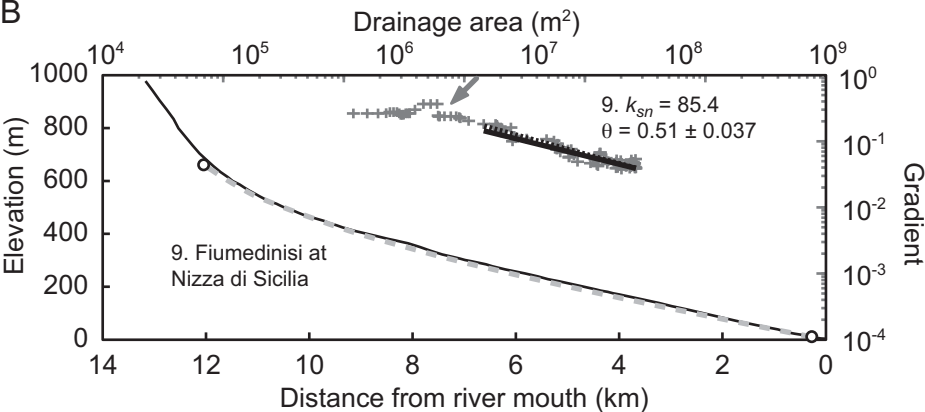

A

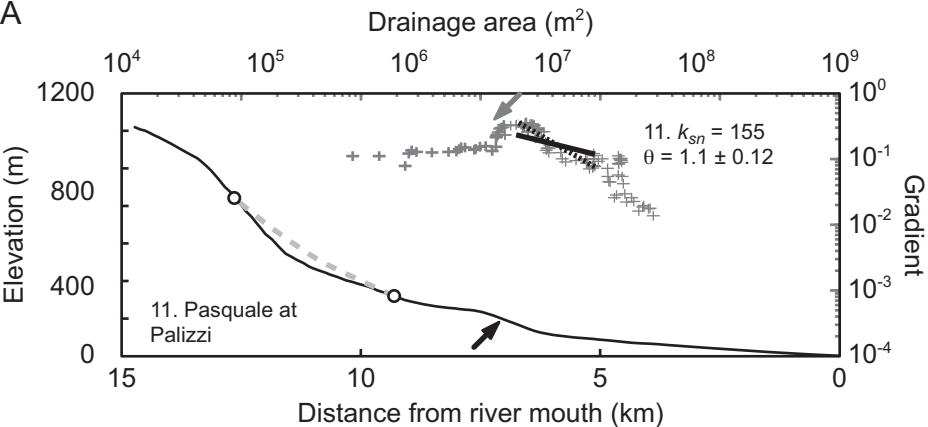

B

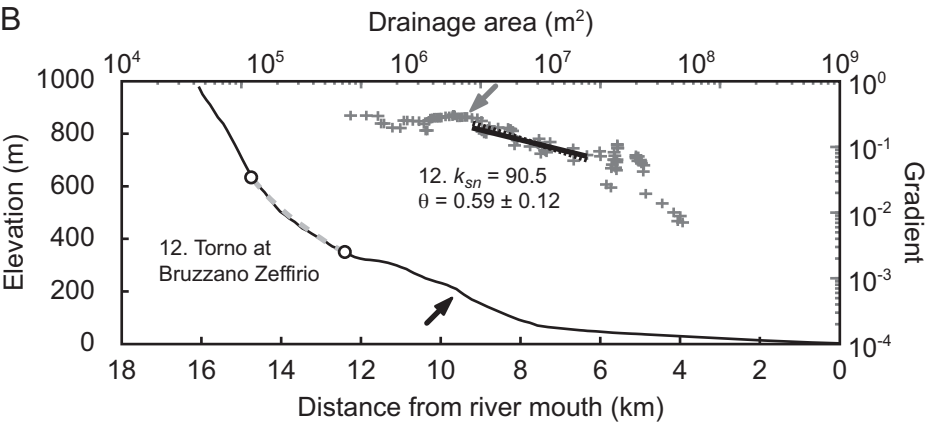

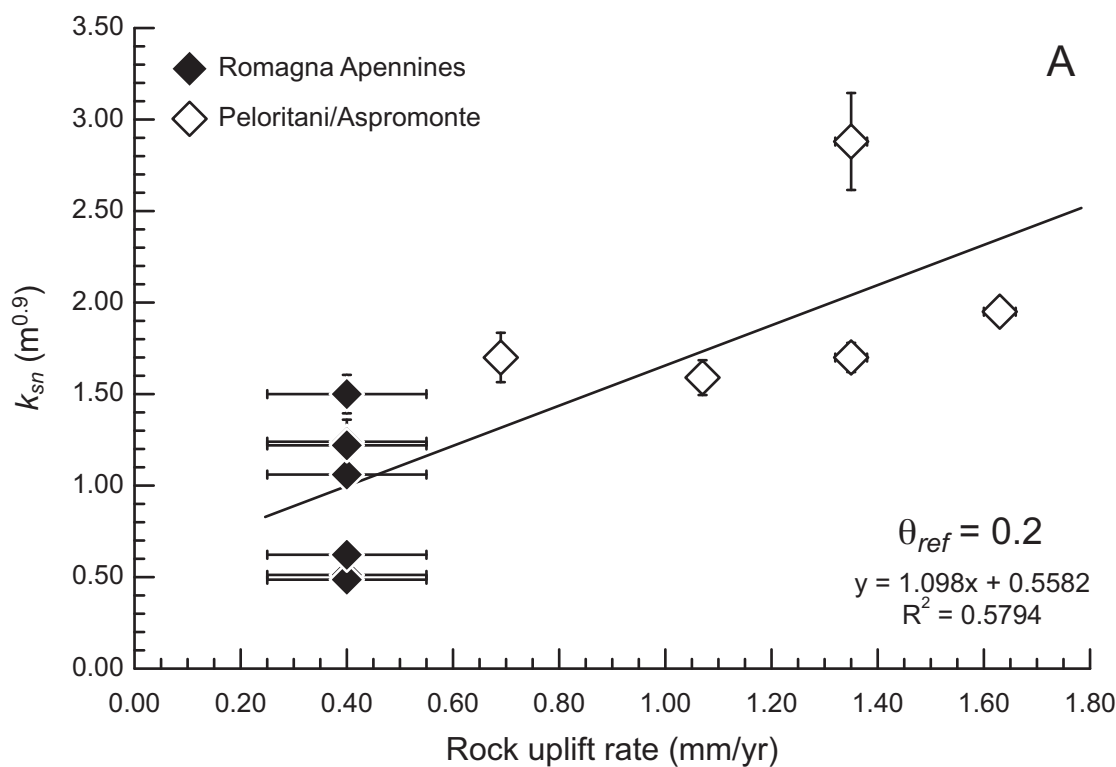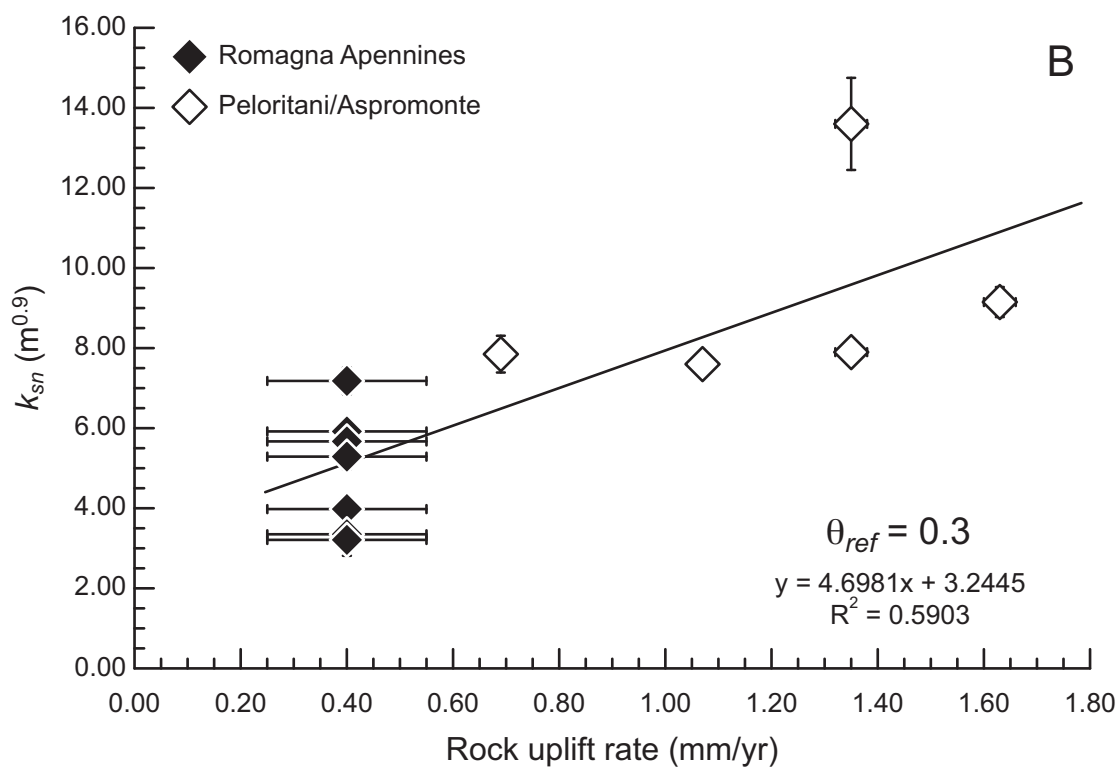

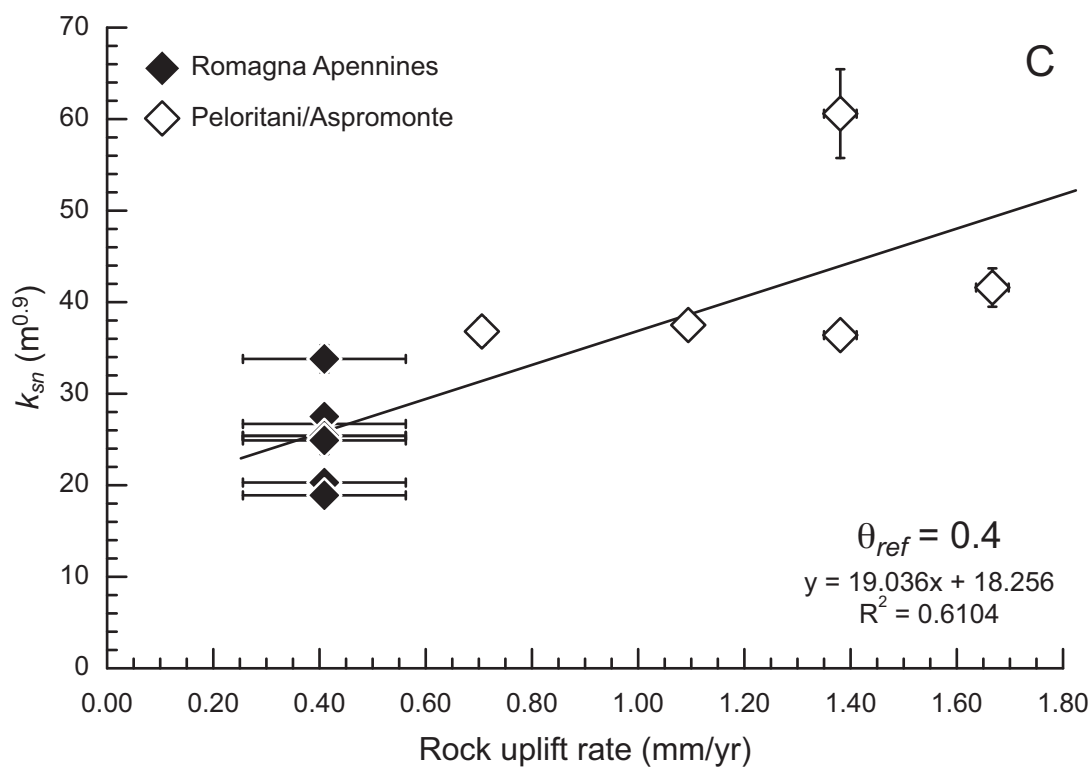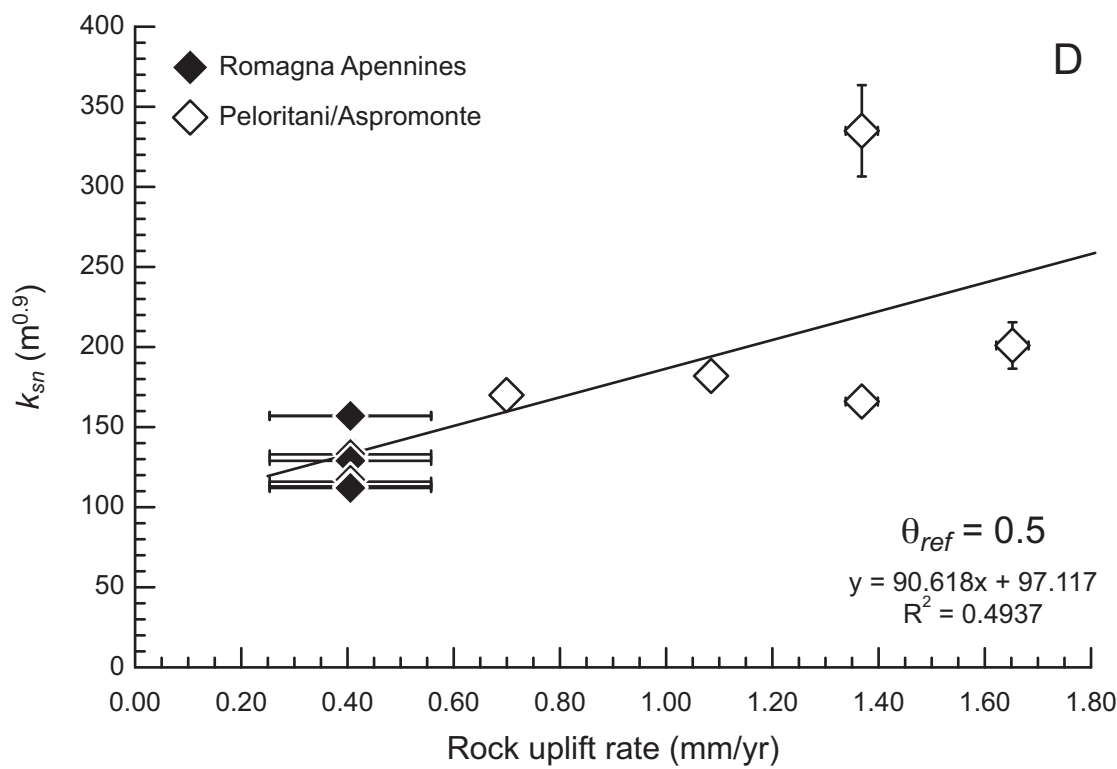



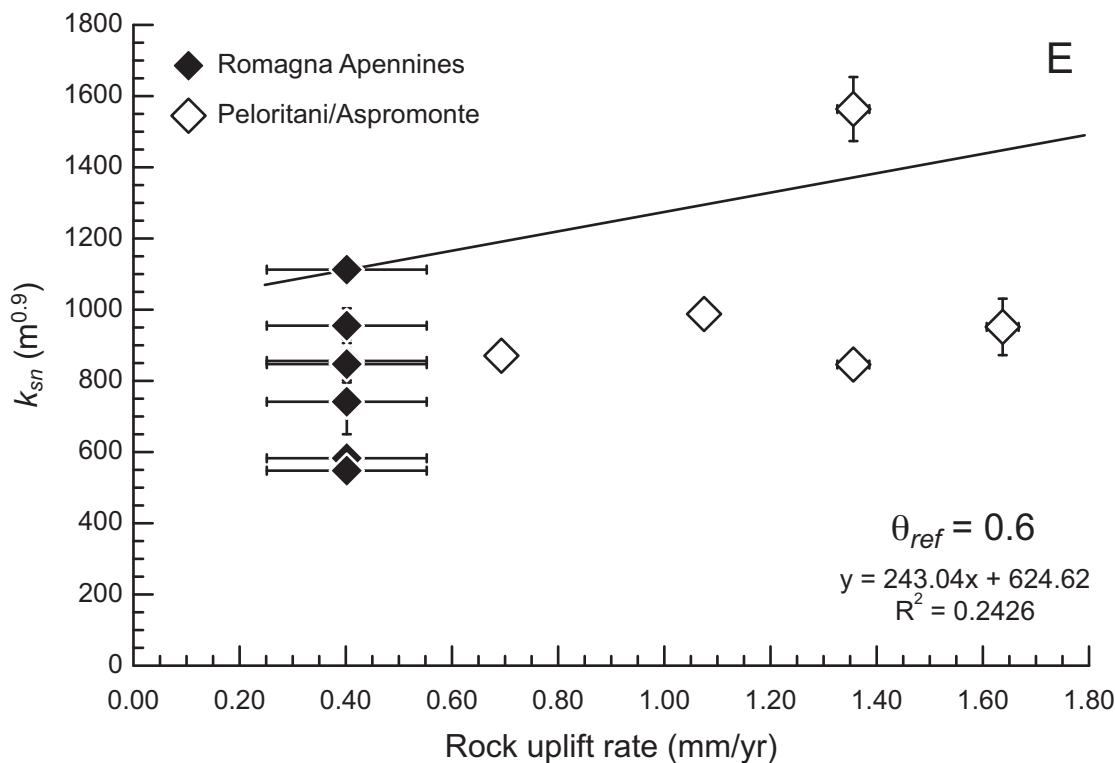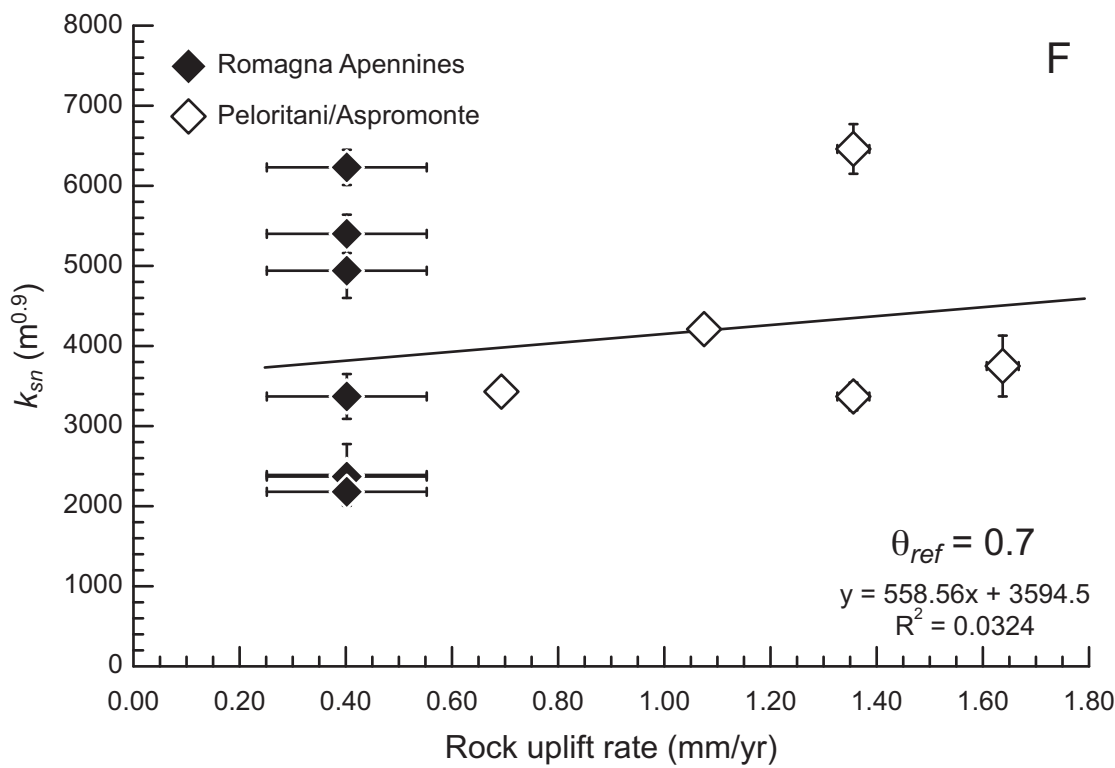

TABLE DR1. SEA LEVEL-HIGH LATITUDE  
PRODUCTION RATE CONSTANTS FOR  
CALCULATION OF COSMOGENIC NUCLIDE  
EROSION RATES

| <u>Physical Constants</u>                      |                                  |
|------------------------------------------------|----------------------------------|
| $^{10}\text{Be}$ radioactive mean life, $\tau$ | $1.96 \pm 0.10$ Myr              |
| Rock density, $\rho$                           | $2.6 \text{ g/cm}^3$             |
| <u>SLHL production rates</u>                   |                                  |
| $P_n$                                          | $4.350 \text{ at/g (quartz)/yr}$ |
| $P_{\mu 1}$                                    | $0.084 \text{ at/g (quartz)/yr}$ |
| $P_{\mu 2}$                                    | $0.018 \text{ at/g (quartz)/yr}$ |
| $P_{\mu 3}$                                    | $0.022 \text{ at/g (quartz)/yr}$ |
| <u>Attenuation Lengths</u>                     |                                  |
| $\Lambda_n$                                    | $160.0 \text{ g/cm}^2$           |
| $L_1$                                          | $738.6 \text{ g/cm}^2$           |
| $L_2$                                          | $2688.0 \text{ g/cm}^2$          |
| $L_3$                                          | $4360.0 \text{ g/cm}^2$          |

TABLE DR2. NORMALIZED CHANNEL STEEPNESS INDICES CALCULATED FOR A RANGE OF REFERENCE CONCAVITIES

| River<br>(river at location)*      | Rock uplift rate<br>(mm/yr) | Reference Concavity ( $\theta_{ref}$ ) |               |             |             |              |               |            |
|------------------------------------|-----------------------------|----------------------------------------|---------------|-------------|-------------|--------------|---------------|------------|
|                                    |                             | 0.2                                    | 0.3           | 0.4         | 0.45        | 0.5          | 0.6           | 0.7        |
| <u>Romagna Apennines</u>           |                             |                                        |               |             |             |              |               |            |
| 1. Visano at Palazzuolo            | 0.40 ± 0.15                 | 1.220 ± 0.07                           | 5.920 ± 0.245 | 26.7 ± 0.5  | 55.7 ± 0.5  | 116.0 ± 2.5  | 518.0 ± 18.0  | 2370 ± 145 |
| 2. Senio at Palazzuolo             | 0.40 ± 0.15                 | 1.240 ± 0.12                           | 5.670 ± 0.390 | 25.4 ± 1.0  | 52.7 ± 1.4  | 112.0 ± 2.0  | 487.0 ± 9.0   | 2180 ± 100 |
| 3. Senio at Casola                 | 0.40 ± 0.15                 | 0.622 ± 0.03                           | 3.980 ± 0.185 | 24.9 ± 1.1  | 62.4 ± 1.3  | 157.0 ± 5.0  | 989.0 ± 31.0  | 6230 ± 220 |
| 4. Lamone at Biforco               | 0.40 ± 0.15                 | 1.500 ± 0.11                           | 7.180 ± 0.335 | 33.8 ± 1.5  | 58.9 ± 0.7  | 157.0 ± 5.0  | 753.0 ± 40.5  | 3370 ± 280 |
| 5. Lamone at San Eufemia           | 0.40 ± 0.15                 | 0.486 ± 0.06                           | 3.21 ± 0.395  | 18.9 ± 0.9  | 63.7 ± 1.5  | 113.0 ± 8.5  | 761.0 ± 54.0  | 4940 ± 340 |
| 6. Montone at San Benedetto        | 0.40 ± 0.15                 | 1.060 ± 0.04                           | 5.29 ± 0.320  | 25.4 ± 2.0  | 46.0 ± 1.0  | 129.0 ± 12.5 | 659.0 ± 81.0  | 2390 ± 385 |
| 7. Montone at Davadola             | 0.40 ± 0.15                 | 0.512 ± 0.04                           | 3.35 ± 0.270  | 20.3 ± 1.25 | 63.4 ± 2.0  | 133.0 ± 8.0  | 849.0 ± 43.5  | 5400 ± 240 |
| <u>Peloritani/Aspromonte</u>       |                             |                                        |               |             |             |              |               |            |
| 8. Pagliara at Roccalumera         | 1.07 ± 0.02                 | 1.590 ± 0.095                          | 7.600 ± 0.300 | 37.5 ± 1.0  | 75.3 ± 1.0  | 182.0 ± 2.0  | 878.0 ± 12.0  | 4210 ± 120 |
| 9. Fiumedinisi at Nizza di Sicilia | 1.63 ± 0.03                 | 1.950 ± 0.065                          | 9.150 ± 0.375 | 41.6 ± 2.1  | 85.4 ± 0.5  | 201.0 ± 14.5 | 846.0 ± 70.5  | 3750 ± 380 |
| 10. San Elia at Penteditillo       | 1.35 ± 0.03                 | 1.700 ± 0.08                           | 7.900 ± 0.230 | 36.4 ± 0.5  | 81.8 ± 0.8  | 166.0 ± 3.0  | 752.0 ± 26.0  | 3370 ± 175 |
| 11. San Pasquale at Palizzi        | 1.35 ± 0.03                 | 2.880 ± 0.27                           | 13.60 ± 1.15  | 60.6 ± 4.85 | 155.0 ± 5.4 | 335.0 ± 28.5 | 1390.0 ± 80.0 | 6460 ± 310 |
| 12. Torno at Burzzano Zeffirio     | 0.69 ± 0.02                 | 1.700 ± 0.14                           | 7.85 ± 0.46   | 36.8 ± 1.45 | 90.5 ± 11.5 | 170.0 ± 5.0  | 774.0 ± 14.5  | 3430 ± 65  |

\*Location is name of town nearest to where sample was collected, according to the Millennial edition of the Atlante stradale d'Italia, published by the Touring Club Italiano
